# Supplementary material
Source: PubMed Central journal article supplement (PMC11072329)
Supplement: 18_2024_5204_MOESM1_ESM.pdf [file 18_2024_5204_MOESM1_ESM.pdf]

Supplementary Information for

## Phosphorylation of the compartmentalized PKA substrate TAF15 regulates RNA-protein interactions

Andreas Feichtner<sup>1,2</sup>, Florian Enzler<sup>3</sup>, Valentina Kugler<sup>1,2</sup>, Katharina Hoppe<sup>4</sup>, Sophia Mair<sup>5,6</sup>, Leopold Kremser<sup>7</sup>,  Herbert Lindner<sup>7</sup>,  Roland G. Huber<sup>8</sup>,  Ulrich Stelzl<sup>9</sup>,  Eduard Stefan<sup>1,2\*</sup>, and  Omar Torres-Quesada<sup>1,10\*</sup>

Omar Torres-Quesada; Tel +43 512 9003 70116

Eduard Stefan; Tel +43 512 507 57531

**Email:** [omar.torres-quesada@i-med.ac.at](mailto:omar.torres-quesada@i-med.ac.at)  
[eduard.stefan@uibk.ac.at](mailto:eduard.stefan@uibk.ac.at)

**This PDF file includes:**

Figures S1 to S6  
Table S1

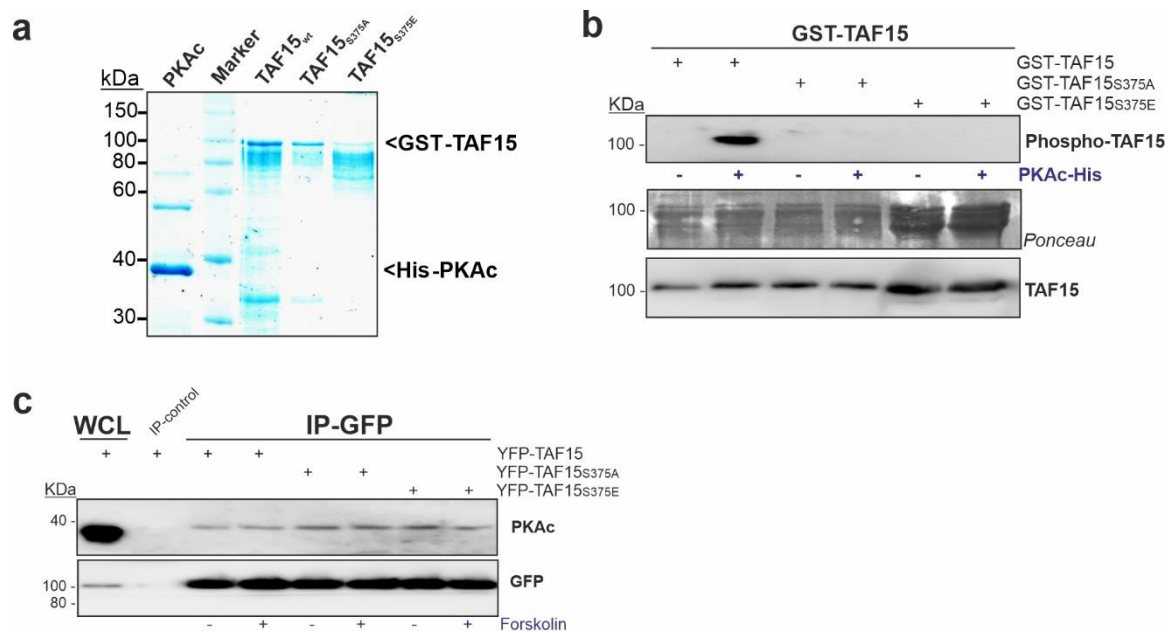

**Figure S1. TAF15 and PKA are in the same protein complex but PKA phosphorylation does not influence TAF15-PKA protein-protein interaction.** (a) Coomassie staining of the purified PKAc-His and YFP-TAF15 recombinant proteins used for in vitro phosphorylation experiments (b) In vitro phosphorylation of TAF15 by PKA. In-vitro phosphorylation experiments of recombinant GST-TAF15 purified proteins in the presence of recombinant His-tagged PKAc [1] and using the RRx-S/T phospho-PKA antibody (N=3). (c) Western-Blot analysis of the interaction between PKAc-TAF15. HEK cells were co-transfected with PKAc-mCherry and the YFP-TAF15 variants and transiently express them during 48 h. Forskolin-treated samples were performed with 20  $\mu$ M for 15 min. Cells lysates were subjected to IP with the GFP antibody. WCL represent 0.5% of the IP amounts.

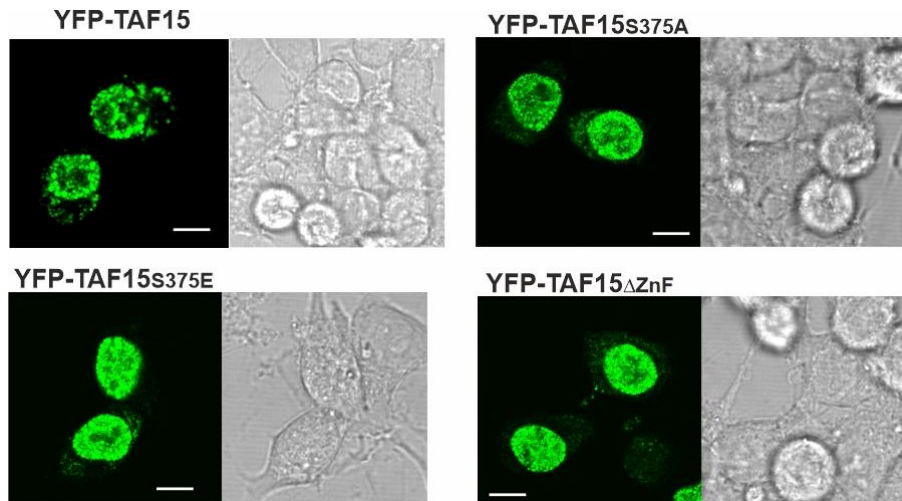

**Figure S2. Cellular localization of the YFP-TAF15 variants.** HEK293 cells were transfected with the indicated constructs and transiently expressed in a chambered coverslip  $\mu$ -slide 8-well high at 37°C, 5% CO<sub>2</sub> for 48h. Live-cell imaging was performed using a Leica TCS SP5 II inverse laser scanning microscope

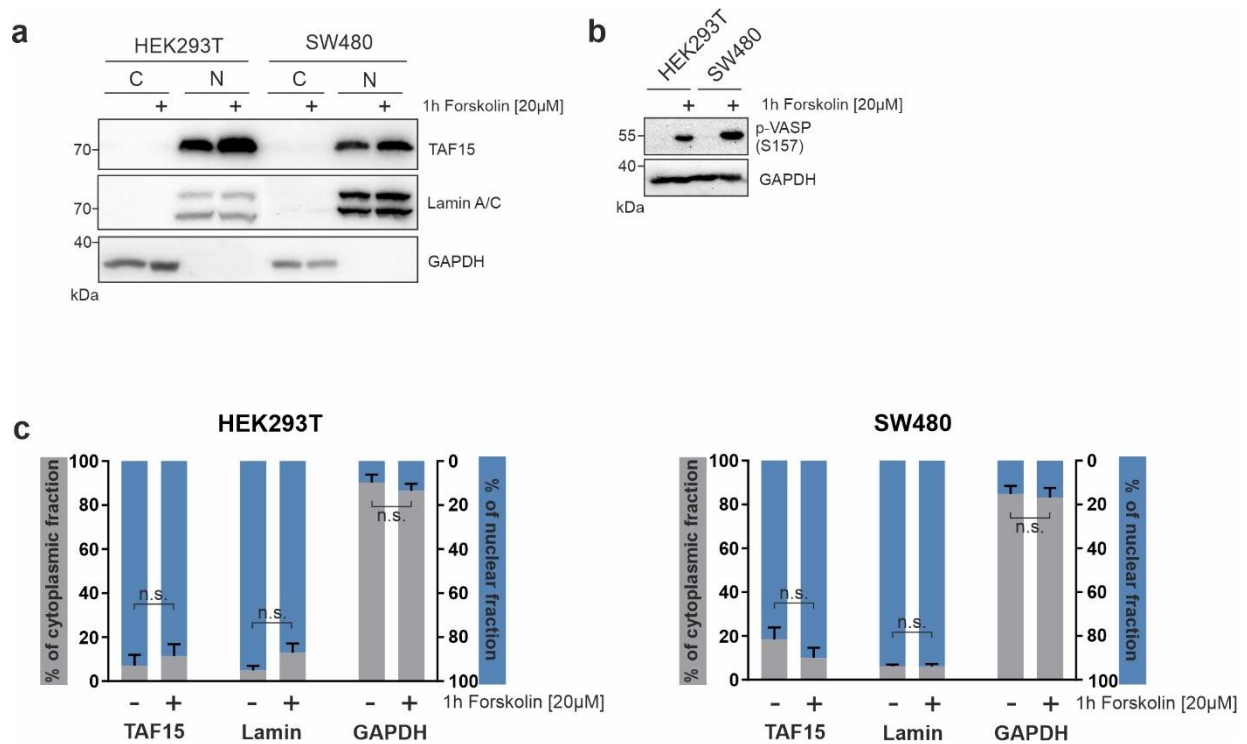

**Figure S3. cAMP elevation does not influence TAF15 subcellular localization.** Cells, specifically HEK293T and SW480, were cultured in Dulbecco's modified Eagle's medium (DMEM) with 10% fetal bovine serum (FBS) under conditions of 37°C and 5% CO<sub>2</sub>. Subsequently, upon reaching 80% confluence, the cells were subjected to a 15-minute treatment with 20μM Forskolin. **(a)** Western blot analysis from the cytoplasmic (C) and nuclear (N) fractions. **(b)** Blot corresponding to the confirmation of PKA activation of the Forskolin treatments. **(c)** Quantification of the signals from (a). All representative blots from N=3 independent experiments. Shown are the quantification values (mean ±SEM). Statistical significance was assessed using an unpaired t-student, (n.s.): non-significant.



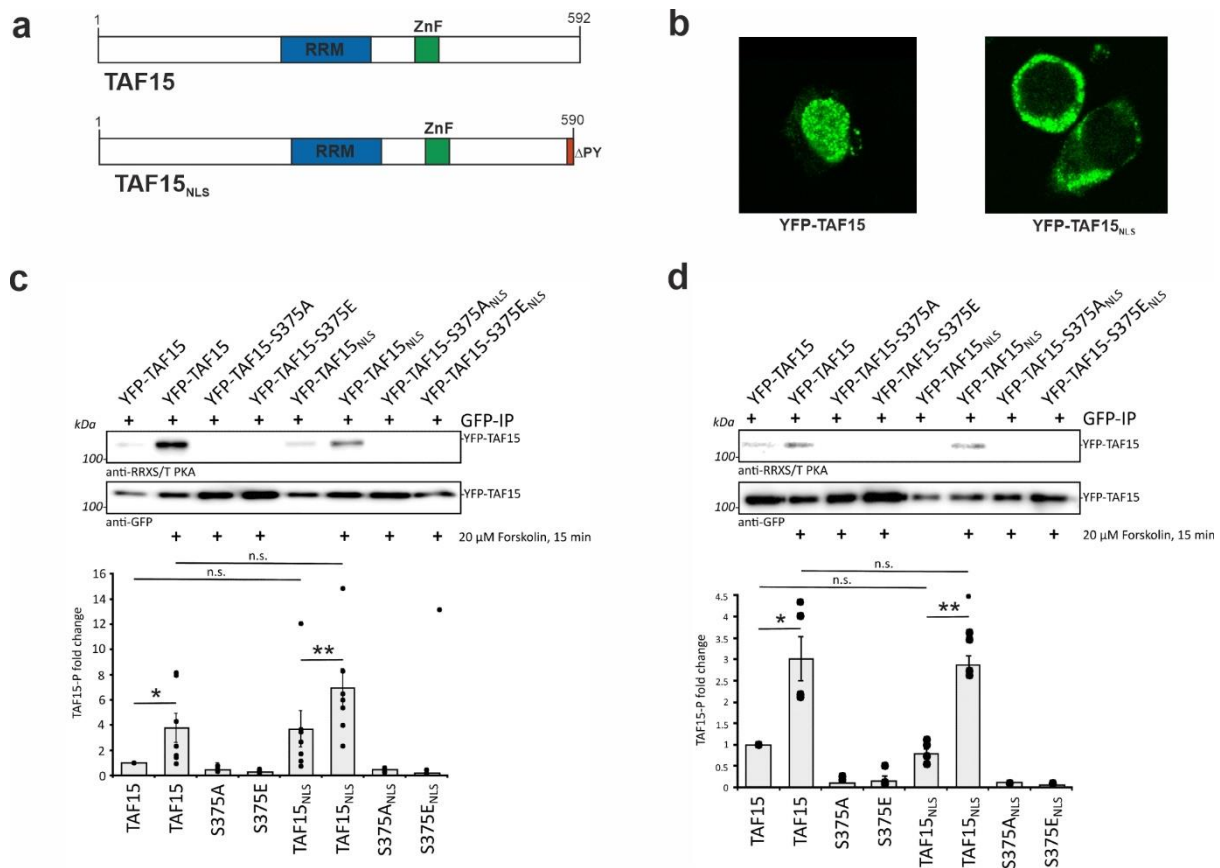

**Figure S5. The cytoplasmic TAF15 is phosphorylated by PKA in HEK293T and U87 MG cell lines.** (a) Schematic depiction of the nuclear TAF15 (above) and cytoplasmic TAF15 ( $\Delta$ PY mutant, below). (b) Confocal microscopy analysis of HEK293 cells transiently expressing the YFP-TAF15 and the YFP-TAF15<sub>NLS</sub>. (c) TAF15 phosphorylation experiments of HEK293T cells transiently expressing the indicated constructs. After 48h cells were incubated with forskolin and subjected to lysis and immunoprecipitation using GFP antibody and finally analysed by Western-blot using the RRXS/T phosphor-PKA antibody. Signals were quantified by densitometric analysis and normalized against the GFP levels and the non-treated wild-type sample. (b) Same experiments for U87-MG glioblastoma cells. Representative results of N=6 / N =3 independent experiments. Quantifications mean  $\pm$  SEM. P-values: \*=0.05-0.01, \*\*=0.01-0.005.

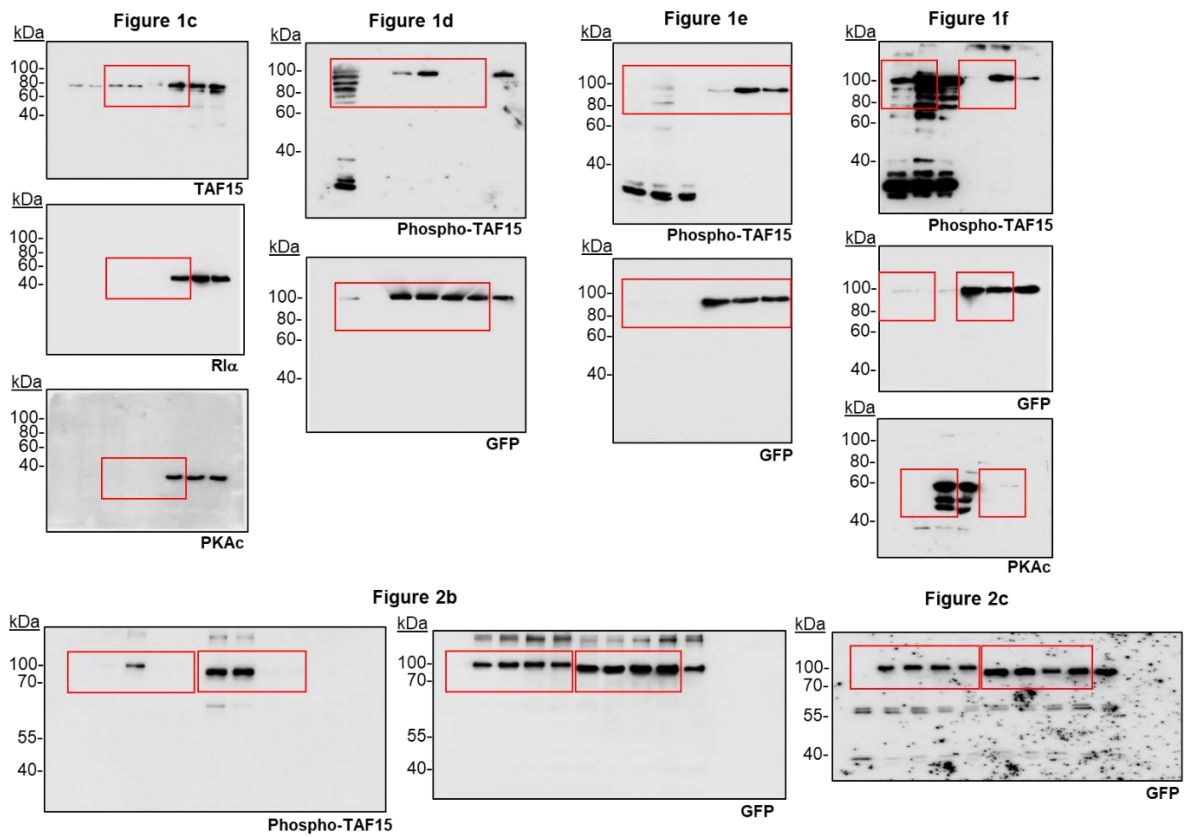

Figure S6. Uncropped gel blots.

**Table S1. Oligonucleotides used in this work.**

| Name                    | Sequence                                                         | Application         | Source    |
|-------------------------|------------------------------------------------------------------|---------------------|-----------|
| YFP-TAF15 Fw            | GACGAAGCTTCATGTCGGATTCTGGAAG                                     | YFP fusion          | This work |
| YFP-TAF15 Rv            | GATGGATCCGGCCGCGTATGGTCGGTTGCGCTGATC                             | YFP fusion          | This work |
| TAF15S375A Fw           | GAACCTTTGCTCGAAGGAATGCCTGCAATCAGTGCAATGAGC                       | S375A mutant        | This work |
| TAF15S375A Rv           | GCTCATTGCACTGATTGCAGGCATTCCTTCGAGCAAAGTTC                        | S375A mutant        | This work |
| TAF15S375E Fw           | GAACCTTTGCTCGAAGGAATGAATGCAATCAGTGCAATGAGC                       | S375E mutant        | This work |
| TAF15S375E Rv           | GCTCATTGCACTGATTGCATTTCCTTCGAGCAAAGTTC                           | S375E mutant        | This work |
| GST_TAF15 Fw            | AACCGGATCCACATGTCGGATTCTGGAAG                                    | GST purification    | This work |
| GST_TAF15 Rv            | GATTGCGGCCGCTCAGTATGGTCG                                         | GST purification    | This work |
| TAF15ΔZnF Fw            | GACTCTCGTCCCTCAGGAGGAGATTTC                                      | ZnF deletion mutant | This work |
| TAF15ΔZnF Rv            | GAGGGACGAGATCGGGGTCTCCACCTCTCCCTTG                               | ZnF deletion mutant | This work |
| TAF15ΔPY Fw             | TGAGCGGCCGCTCGAGTCTAGAG                                          | Cytoplasmic mutant  | This work |
| TAF15ΔPY Rv             | CGAGCGGCCGCTCATCGGTTGCGCTGATCATTCTG                              | Cytoplasmic mutant  | This work |
| L3 - linker:            | rApp/AGATCGGAAGAGCGGTTTCAG/ddC/*                                 | iCLIP               | [2]       |
| RTCLIP_GFP_1            | NNAACNNNAGATCGGAAGAGCGTCGTGGATCCTGAACCGC                         | iCLIP               | [2]       |
| RTCLIP_WT_1             | NNACAANNNAGATCGGAAGAGCGTCGTGGATCCTGAACCGC                        | iCLIP               | [2]       |
| RTCLIP_WT_1+ISO         | NNATTGNNNAGATCGGAAGAGCGTCGTGGATCCTGAACCGC                        | iCLIP               | [2]       |
| RTCLIP_S375A_1          | NNCGCCNNNAGATCGGAAGAGCGTCGTGGATCCTGAACCGC                        | iCLIP               | [2]       |
| RTCLIP_S375A_1+ISO      | NNGCCANNNAGATCGGAAGAGCGTCGTGGATCCTGAACCGC                        | iCLIP               | [2]       |
| RTCLIP_RMM_1            | NNGACNNNAGATCGGAAGAGCGTCGTGGATCCTGAACCGC                         | iCLIP               | [2]       |
| RTCLIP_RMM_1+ISO        | NNGTGGNNNAGATCGGAAGAGCGTCGTGGATCCTGAACCGC                        | iCLIP               | [2]       |
| RTCLIP_RMM- S375A_1     | NNTATTNNNAGATCGGAAGAGCGTCGTGGATCCTGAACCGC                        | iCLIP               | [2]       |
| RTCLIP_RMM- S375A_1+ISO | NNTTAANNNAGATCGGAAGAGCGTCGTGGATCCTGAACCGC                        | iCLIP               | [2]       |
| RTCLIP_GFP_2            | NNACGCNNNAGATCGGAAGAGCGTCGTGGATCCTGAACCGC                        | iCLIP               | [2]       |
| RTCLIP_WT_2             | NNCGATNNNAGATCGGAAGAGCGTCGTGGATCCTGAACCGC                        | iCLIP               | [2]       |
| RTCLIP_WT_2+ISO         | NNCGTANNNAGATCGGAAGAGCGTCGTGGATCCTGAACCGC                        | iCLIP               | [2]       |
| RTCLIP_S375A_2          | NNCTCGNNNAGATCGGAAGAGCGTCGTGGATCCTGAACCGC                        | iCLIP               | [2]       |
| RTCLIP_S375A_2+ISO      | NNGGCGNNNAGATCGGAAGAGCGTCGTGGATCCTGAACCGC                        | iCLIP               | [2]       |
| RTCLIP_RMM_2            | NNGTATNNNAGATCGGAAGAGCGTCGTGGATCCTGAACCGC                        | iCLIP               | [2]       |
| RTCLIP_RMM_2+ISO        | NNTGTGNNNAGATCGGAAGAGCGTCGTGGATCCTGAACCGC                        | iCLIP               | [2]       |
| RTCLIP_RMM- S375A_2     | NNTTCTNNNAGATCGGAAGAGCGTCGTGGATCCTGAACCGC                        | iCLIP               | [2]       |
| RTCLIP_RMM- S375A_2+ISO | NNAGTTNNNAGATCGGAAGAGCGTCGTGGATCCTGAACCGC                        | iCLIP               | [2]       |
| RTCLIP_GFP_3            | NNCTAANNNAGATCGGAAGAGCGTCGTGGATCCTGAACCGC                        | iCLIP               | [2]       |
| RTCLIP_WT_3             | NNCATTNNNAGATCGGAAGAGCGTCGTGGATCCTGAACCGC                        | iCLIP               | [2]       |
| RTCLIP_WT_3+ISO         | NNGGTTNNNAGATCGGAAGAGCGTCGTGGATCCTGAACCGC                        | iCLIP               | [2]       |
| RTCLIP_S375A_3          | NNTCCGNNNAGATCGGAAGAGCGTCGTGGATCCTGAACCGC                        | iCLIP               | [2]       |
| RTCLIP_S375A_3+ISO      | NNTGCCNNNAGATCGGAAGAGCGTCGTGGATCCTGAACCGC                        | iCLIP               | [2]       |
| RTCLIP_RMM_3            | NAAGGNNNAGATCGGAAGAGCGTCGTGGATCCTGAACCGC                         | iCLIP               | [2]       |
| RTCLIP_RMM_3+ISO        | NACGGNNNAGATCGGAAGAGCGTCGTGGATCCTGAACCGC                         | iCLIP               | [2]       |
| RTCLIP_RMM- S375A_3     | NAACGNNNAGATCGGAAGAGCGTCGTGGATCCTGAACCGC                         | iCLIP               | [2]       |
| P5 Solexa               | AATGATACGGCGACCACCGAGATCTACACTCTTCCCTACAC<br>GACGCTCTCCGATCT     | iCLIP               | [2]       |
| P3 Solexa               | CAAGCAGAAGACGGCATAACGAGATCGGTCTCGGCATTCTGC<br>TGAACCGCTCTCCGATCT | iCLIP               | [2]       |
| Cut_oligo               | GTTCAGGATCCACGACGCTCTTCAAAA                                      | iCLIP               | [2]       |

1\* rApp: pre-adenylated; ddC: dideoxycytidine.

2\* RTCLIP primers contain a random barcode sequence (NNxxxxNNN, where N is any base and x the bases of the defined experimental barcode) for the purpose of duplicate removal during sequencing data analysis.



## References

1. Porpora M, Sauchella S, Rinaldi L, Delle Donne R, Sepe M, Torres-Quesada O, et al. Counterregulation of cAMP-directed kinase activities controls ciliogenesis. *Nature communications*. 2018;9(1):1224. doi: 10.1038/s41467-018-03643-9.
2. Huppertz I, Attig J, D'Ambrogio A, Easton LE, Sibley CR, Sugimoto Y, et al. iCLIP: protein-RNA interactions at nucleotide resolution. *Methods*. 2014;65(3):274-87. doi: 10.1016/j.ymeth.2013.10.011.
